# Supplementary material
Source: MDPI journal article supplement (https://www.mdpi.com/1424-8247/15/8/960)
Supplement: s1 [file s1]

Supporting information for

## **Development and Validation of [<sup>3</sup>H]OF-NB1 for Preclinical Assessment of GluN1/2B Candidate Drugs**

Hazem Ahmed <sup>1,†</sup>, Livio Gisler <sup>1,†</sup>, Nehal H. Elghazawy <sup>2</sup>, Claudia Keller <sup>1</sup>, Wolfgang Sippl <sup>2</sup>, Steven H. Liang <sup>3</sup>, Ahmed Haider <sup>3,\*</sup> and Simon M. Ametamey <sup>1,\*</sup>

---

<sup>1</sup> Center for Radiopharmaceutical Sciences ETH-PSI-USZ, Institute of Pharmaceutical Sciences ETH, Vladimir-Prelog-Weg 4, 8093 Zurich, Switzerland

<sup>2</sup> Institute of Pharmacy, Department of Medicinal Chemistry, Martin-Luther-University Halle-Wittenberg, W.-Langenbeck-Str. 4, 06120, Halle, Germany

<sup>3</sup> Division of Nuclear Medicine and Molecular Imaging, Massachusetts General Hospital, and Department of Radiology, Harvard Medical School, Boston, Massachusetts 02114, United States

† These authors made equal contributions to the paper.

\*Corresponding authors:

Dr. Ahmed Haider; email: [Ahmed.Haider@usz.ch](mailto:Ahmed.Haider@usz.ch)

Prof. Dr. Simon M. Ametamey; email: [simon.ametamey@pharma.ethz.ch](mailto:simon.ametamey@pharma.ethz.ch)

## S1. NMR spectra

### S1.1.1 $^1\text{H}$ -NMR of compound 3

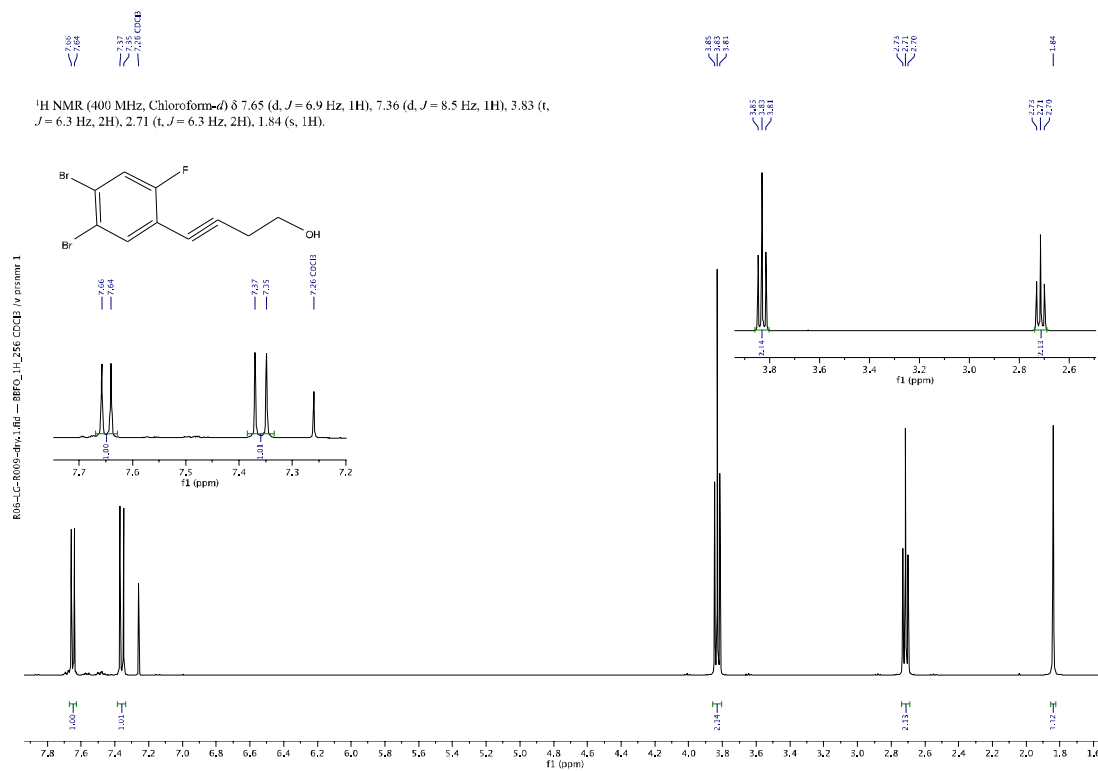

### S1.1.2 $^{13}\text{C}$ -NMR of compound 3

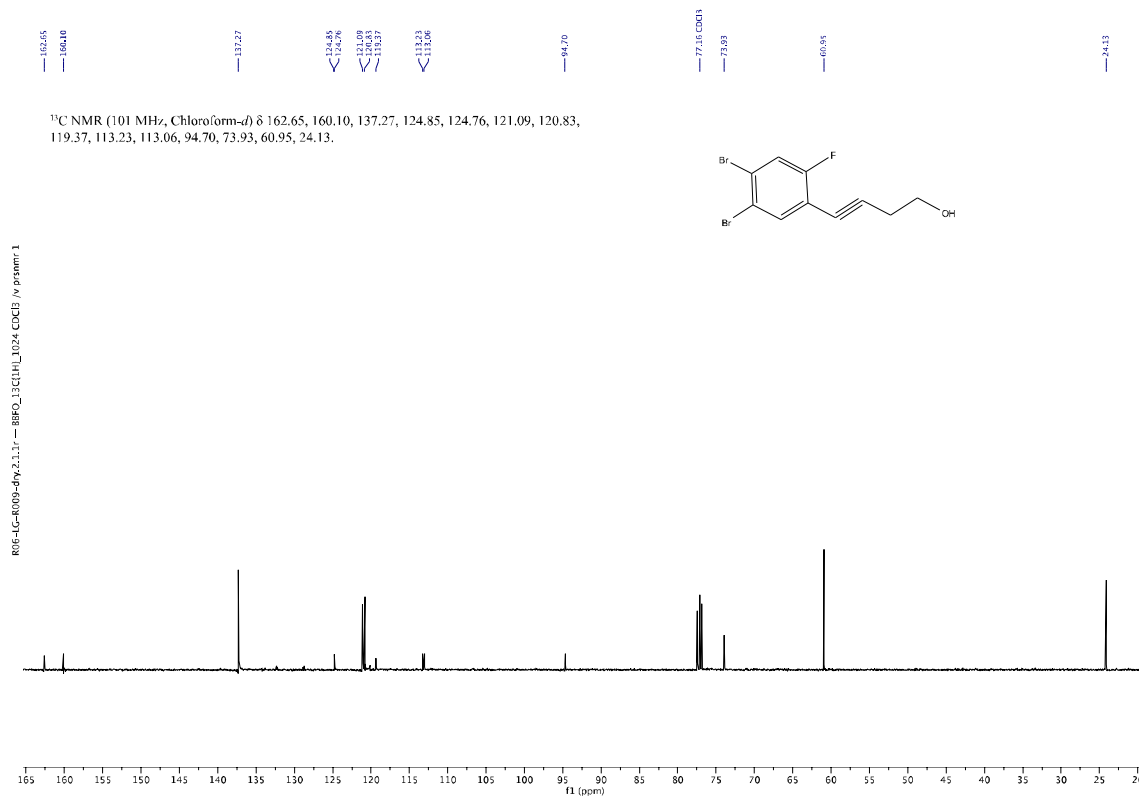

### S1.1.3 $^{19}\text{F}$ -NMR of compound 3

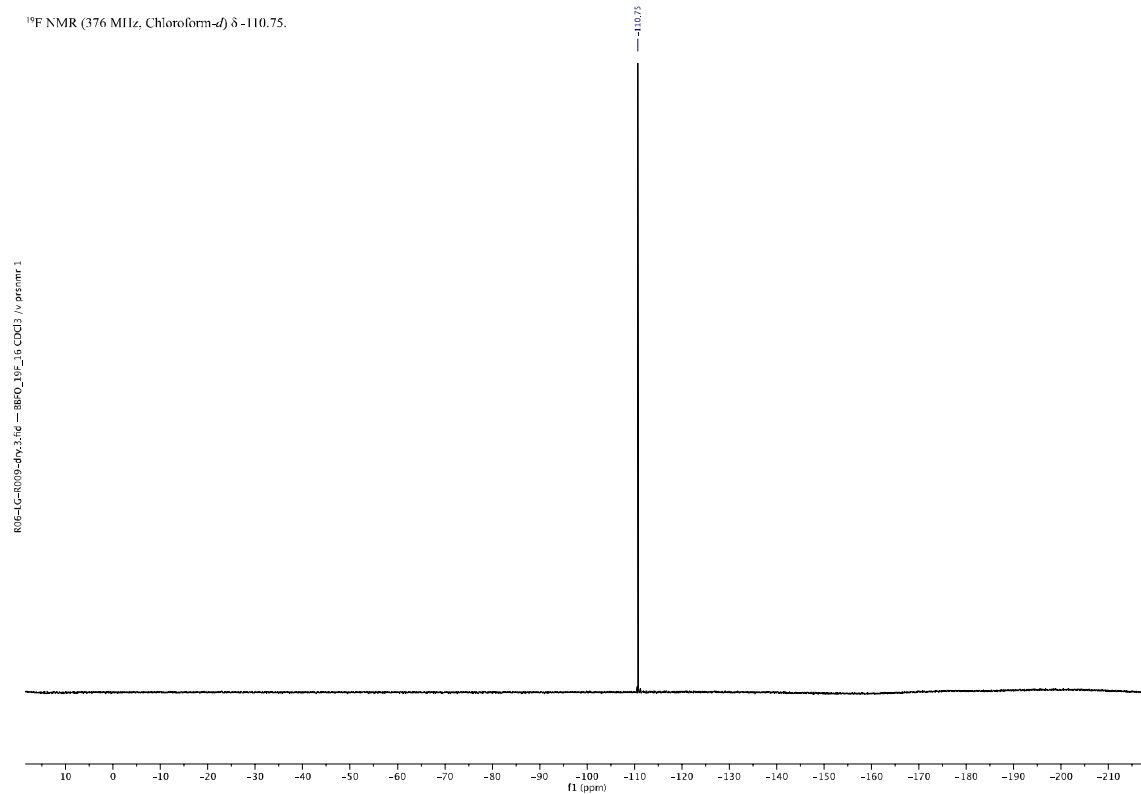

### S1.2.1 <sup>1</sup>H-NMR of compound 7

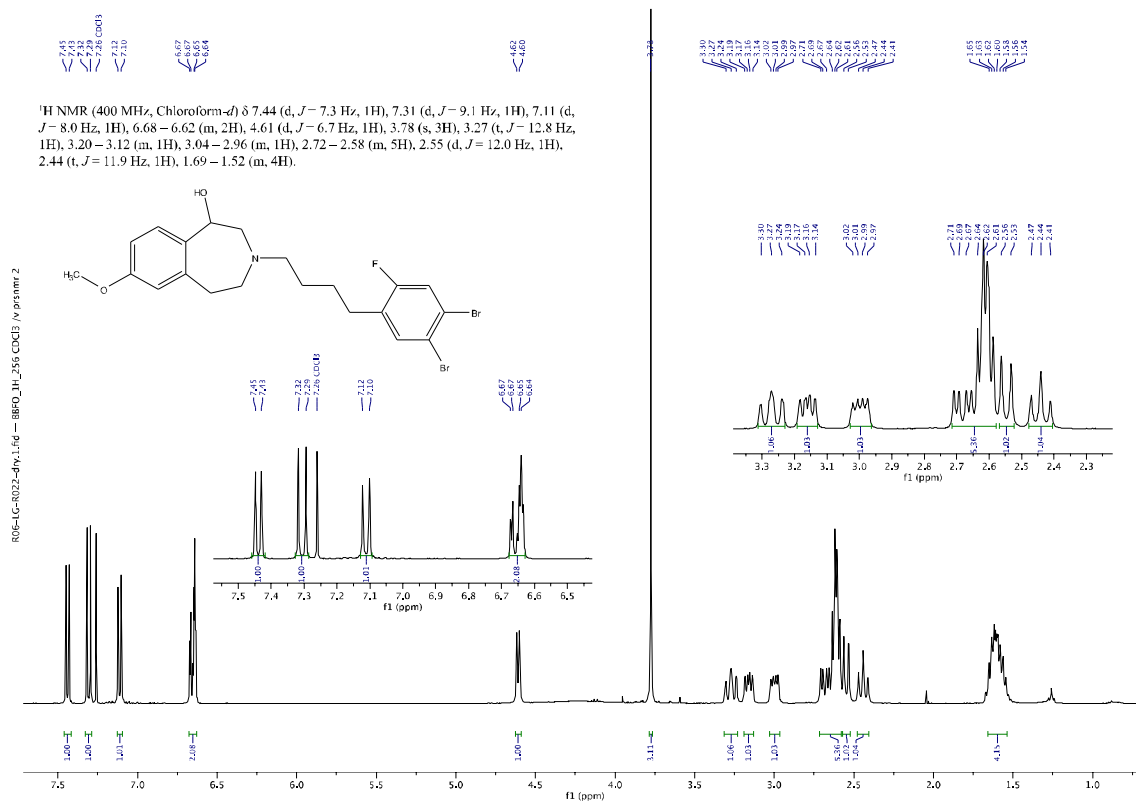

## S1.2.2 $^{13}\text{C}$ -NMR of compound 7

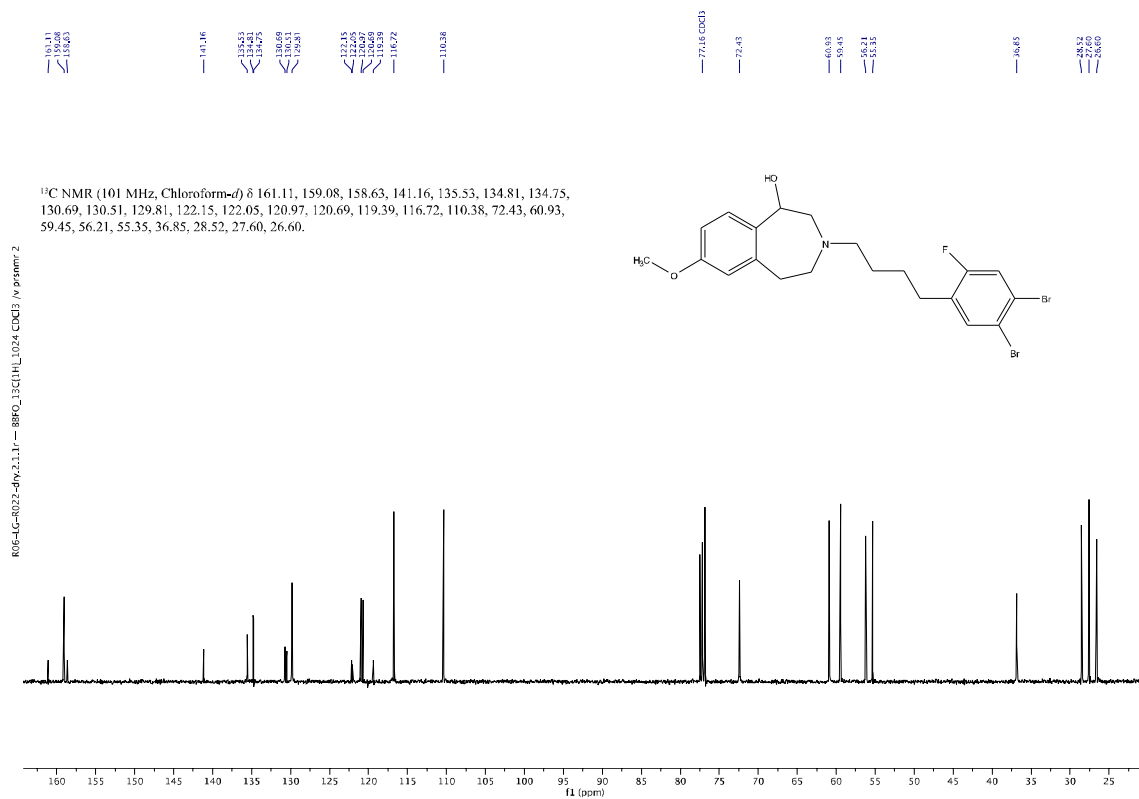

### S1.2.3 $^{19}\text{F}$ -NMR of compound 7

$^{19}\text{F}$  NMR (376 MHz, Chloroform- $d$ )  $\delta$  -118.10.

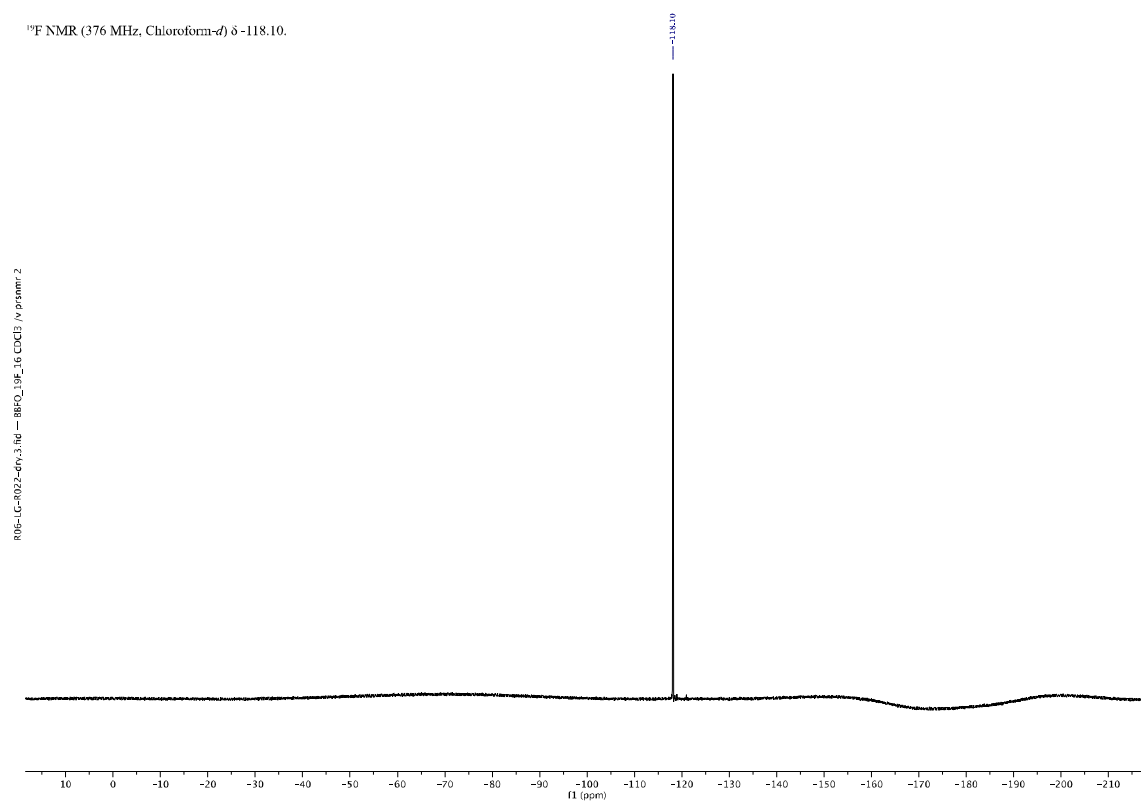

### S1.3.1 <sup>1</sup>H-NMR of compound 8

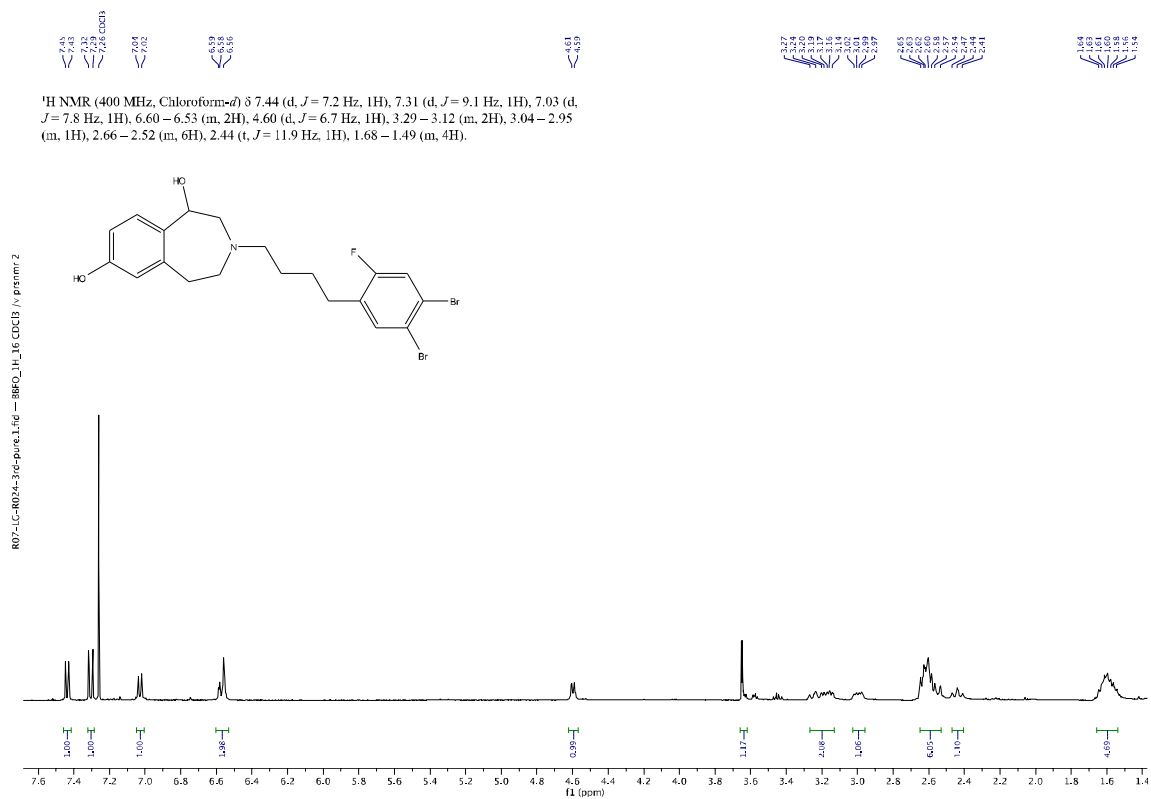



### S1.3.2 $^{13}\text{C}$ -NMR of compound 8

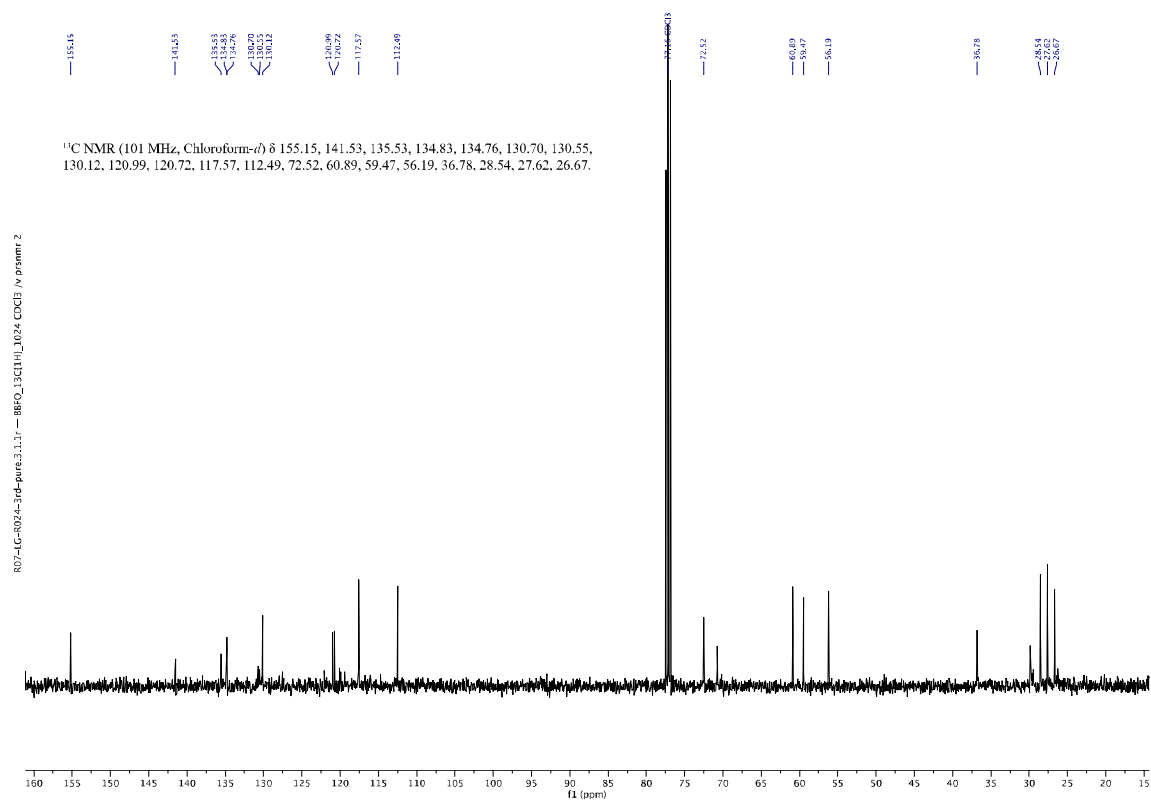

### S1.3.3 $^{19}\text{F}$ -NMR of compound 8

$^{19}\text{F}$  NMR (376 MHz, Chloroform- $d$ )  $\delta$  -118.10.

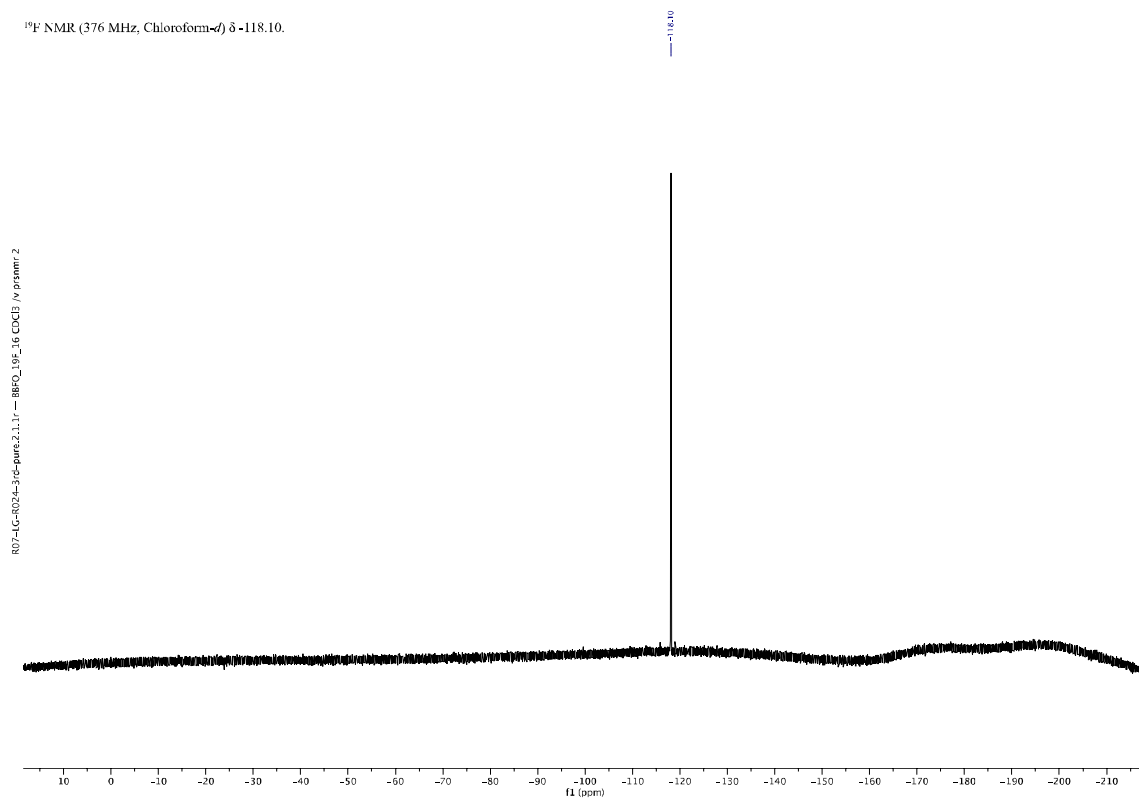

## S2. Quality control of [<sup>3</sup>H]OF-NB1

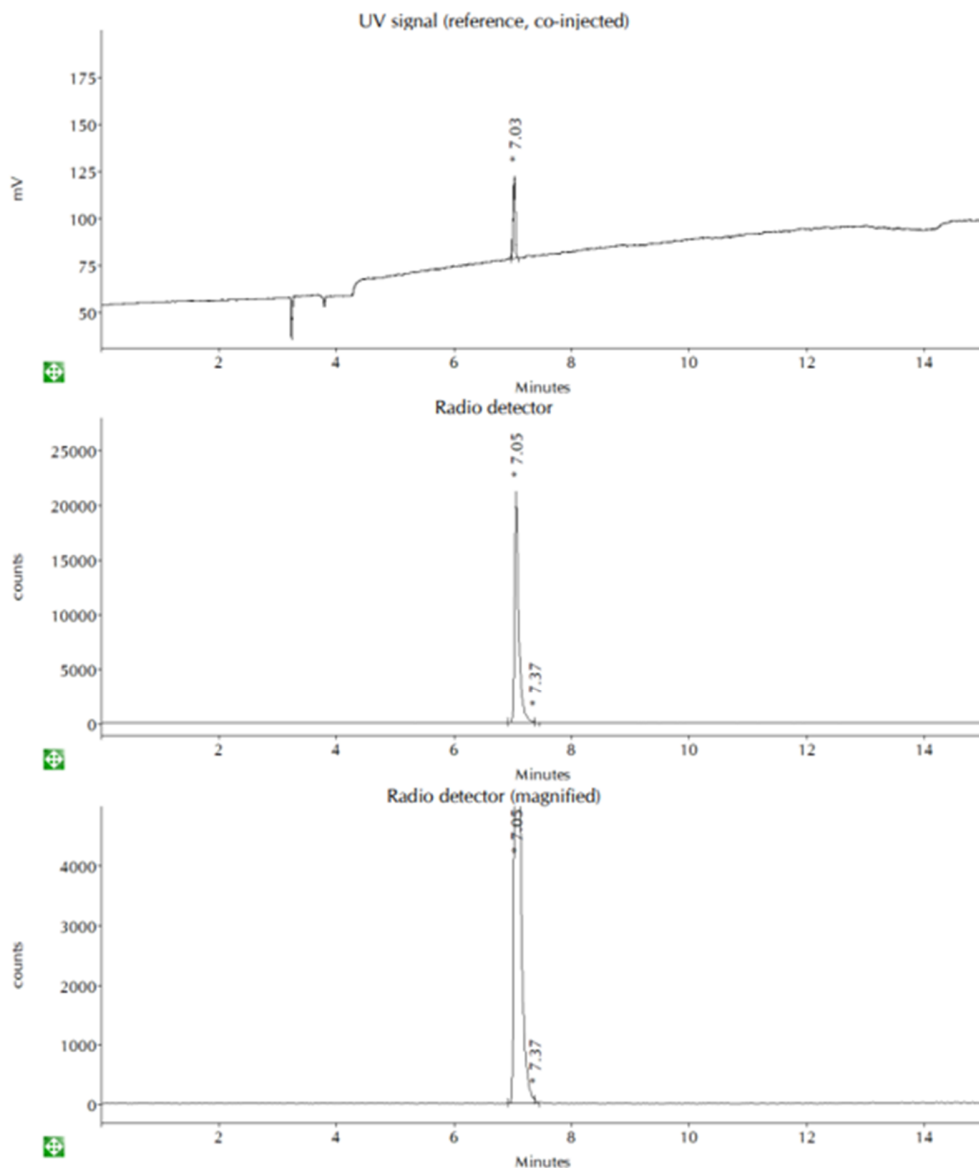

### Results radio detector:

| #   | Peak name | Rt.  | Area      | % Area |
|-----|-----------|------|-----------|--------|
| 1   | OF-NB1    | 7.05 | 104091.88 | 99.88  |
| 2   |           | 7.37 | 120.13    | 0.12   |
| Sum |           |      | 104212.00 | 100.00 |

Supp. Figure S1. Quality control chromatogram of [<sup>3</sup>H]OF-NB1 provided by Tritec. The identity of the raditracer by co-injection with OF-NB1. Radiochemical purity was found to be >99%. The sample was injected in a HPLC system equipped with a Waters Sunfire C18 (5 μm), 4.6 x 250 mm HPLC column. The starting mobile phase composition was A: water + 0.05% TFA; B: MeCN + 0.05% TFA. The radiostracer was eluted at a flow rate of 1.0 mL/min using the following conditions; 0 min 10% B; 10 - 14.5 min 95% B; 15 min 10% B.

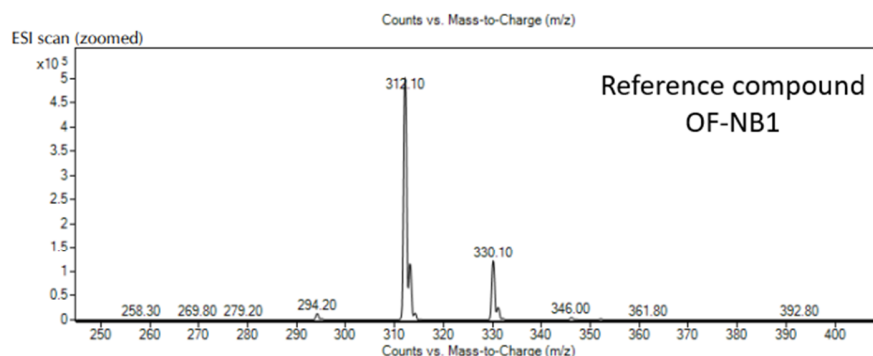

MS peak table of the reference compound

| m/z   | Abundance |
|-------|-----------|
| 330.1 | 122710.4  |
| 331.1 | 25942.9   |
| 332.1 | 3583.1    |
| 333   | 314.5     |
| 333.9 | 225.2     |
| 335.1 | 446.8     |
| 336   | 155.8     |
| 337.2 | 95.6      |

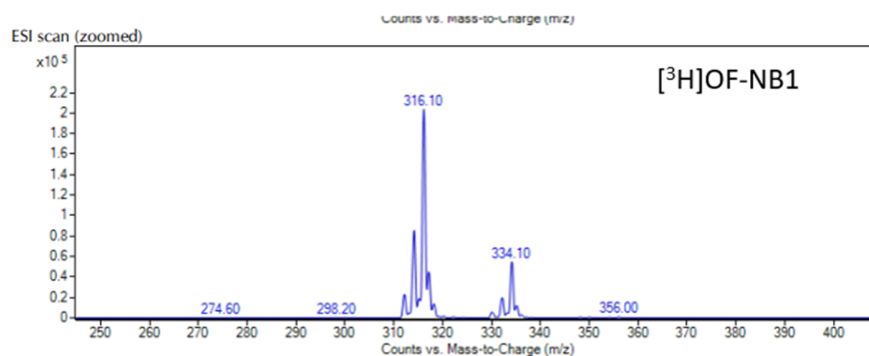

MS peak table of the labeled compound

| m/z   | Abundance |
|-------|-----------|
| 330   | 5665.78   |
| 331.2 | 1164.22   |
| 332.2 | 19778.55  |
| 333.2 | 5004.78   |
| 334.1 | 54751.22  |
| 335.1 | 12048.89  |
| 336.1 | 3220.67   |
| 337.2 | 895.89    |
| 338.1 | 402.67    |
| 339.1 | 178.67    |
| 340   | 0         |
| 341   | 157.67    |
| 342.2 | 109.89    |

Supp. Figure S2. Mass spectrum of the reference compound and [<sup>3</sup>H]OF-NB1 after measurement on a LC-MS as provided by Tritec. The data was recorded on an Agilent LC-MS 6120 (single quadrupole) after eluting from an Agilent Zorbax Eclipse Plus C18 column (1.8  $\mu$ m); 2.1 x 50 mm. The starting mobile phase composition was A: water + 0.1% TFA; B: MeCN + 0.1% TFA. The radiotracer was eluted at a flow rate of 0.6 mL/min using the following conditions; 0 min 5% B; 0.2 min 5% B; 4 min 95% B.

### S3. PET imaging of a Wistar rat using [ $^{18}\text{F}$ ]fluspidine

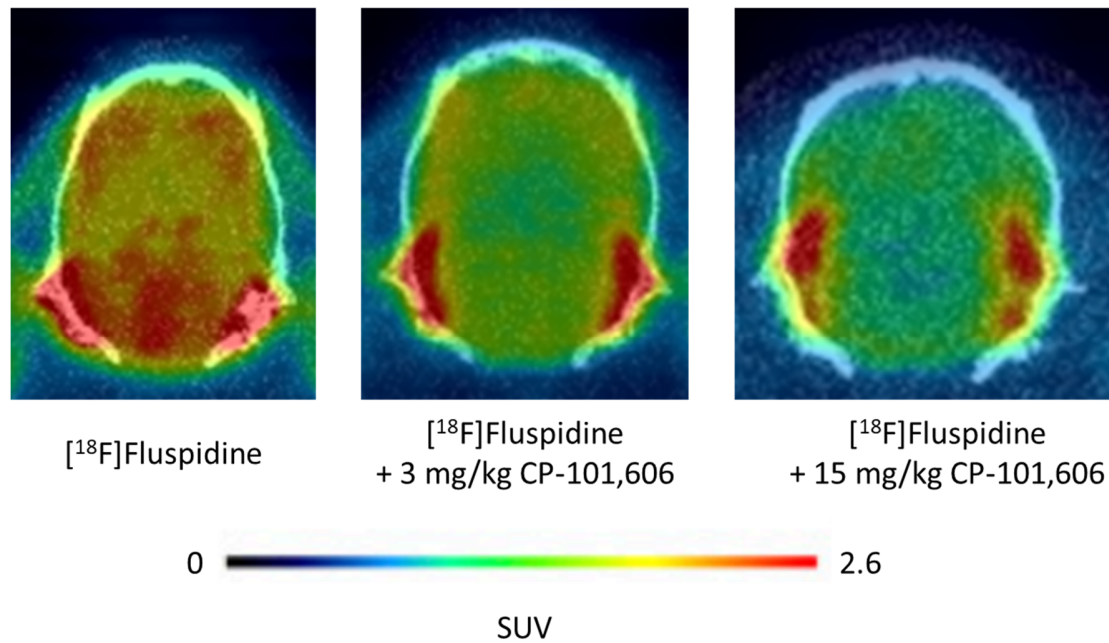

Supp. Figure S3. Coronal PET images of [ $^{18}\text{F}$ ]fluspidine averaged over 90 min in Wistar rats. The brain images are shown for rats under baseline and blockade conditions (3 and 15 mg of CP-101,606 per kilogram) superimposed on the respective recorded CT image. The colour indicates the minimum and maximum standard uptake values (SUVs). The SUV is defined as the accumulated radioactivity [Bq] per tissue [g] / injected dose per body weight.

#### S4. Docking overlay

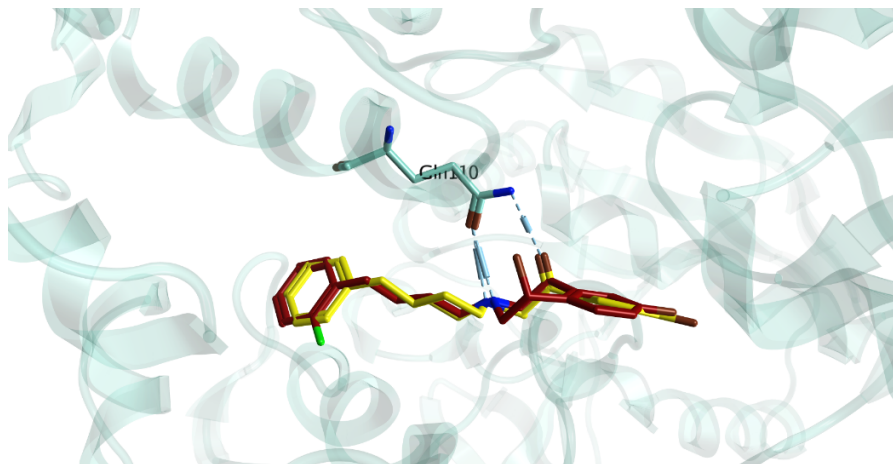

Supp. Figure S4. Docking overlay of ifenprodil and OF-NB1 against the GluN1b/2B receptor (3QEL).

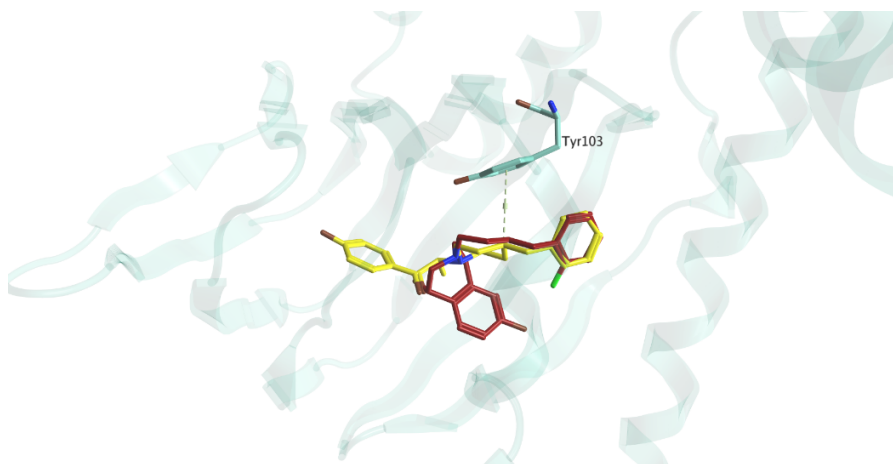

Supp. Figure S5. Docking overlay of ifenprodil and OF-NB1 against the  $\sigma_1$  receptor (6DK1).
